# Supplementary material for: A NiCoSex/CG heterostructure with strong interfacial interaction showing rapid diffusion kinetics as a flexible anode for high-rate sodium storage
Source: Royal Society of Chemistry journal article supplement (doi:10.1039/d3dt00273j), 2023-01-01
Supplement: d3dt00273j1.pdf [file d3dt00273j1.pdf]

# **Strongly interfacial interaction NiCoSe<sub>x</sub>/CG heterostructure with rapid diffusion kinetics as flexible anode for high-rate sodium storage**

*Dan Li,<sup>1,2\*</sup> Honglang Liu,<sup>1,2</sup> Hanhao Liu,<sup>1,2</sup> Yanjun Chen,<sup>1,2</sup> Chao Wang<sup>1,2\*</sup> and Li*

*Guo<sup>2\*</sup>*

1 School of Materials Science and Engineering, North University of China, Taiyuan,  
China

2 Advanced Energy Materials and Systems Institute, North University of China,  
Taiyuan, China

\* Corresponding author: [lidan@nuc.edu.cn](mailto:lidan@nuc.edu.cn) (Dan Li), [wangchao\\_nuc@126.com](mailto:wangchao_nuc@126.com) (Chao Wang), [guoli@nuc.edu.cn](mailto:guoli@nuc.edu.cn) (Li Guo)

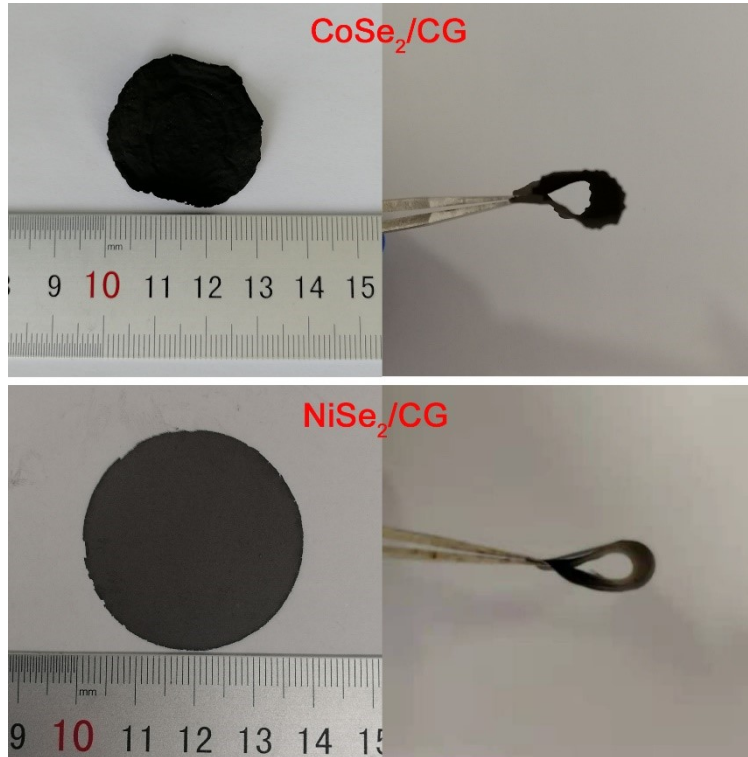

**Fig. S1** Photographs of CoSe<sub>2</sub>/CG and NiSe<sub>2</sub>/CG in the tiled and curled state.

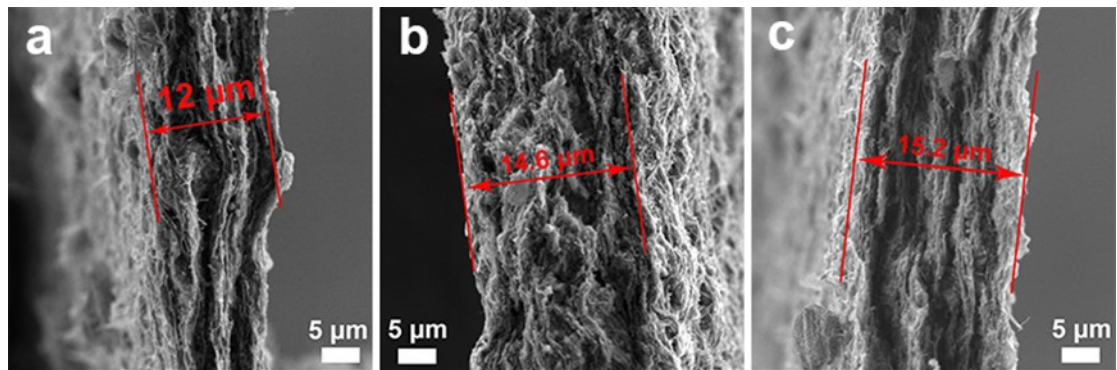

**Fig. S2** Cross sectional SEM pictures of CoSe<sub>2</sub>/CG (a), NiSe<sub>2</sub>/CG (b) and NiCoSe<sub>x</sub>/CG (c) films.

#### **Calculation of the relative content of CoSe<sub>2</sub> and carbon in CoSe<sub>2</sub>/CG.**

As shown in Figure 1c, the weight loss of CoSe<sub>2</sub>/CG is 77.8 wt%. After heating to 500 °C in the air, the final product is Co<sub>3</sub>O<sub>4</sub>. According to the reaction equation (1), the weight loss from pure CoSe<sub>2</sub> to Co<sub>3</sub>O<sub>4</sub> is 63.0 wt%. The weight reduction of composite is consisted of two parts: weight

loss of the variation from  $\text{CoSe}_2$  to  $\text{Co}_3\text{O}_4$  and the weight loss of carbon oxidation, which can be illustrated as the equation (2):

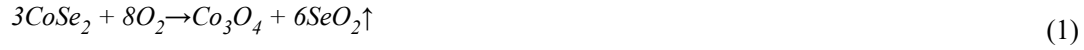

$$W \times 63.0\% + 100\% - W = 77.8\% \quad (2)$$

W represents the loading content of  $\text{CoSe}_2$ , and the loading content of carbon is (100%-W). Thus, the content of  $\text{CoSe}_2$  in  $\text{CoSe}_2/\text{CG}$  can be calculated as 60.0 wt%.

#### **Calculation of the relative content of $\text{NiSe}_2$ and carbon in $\text{NiSe}_2/\text{CG}$ .**

As shown in Figure 1c, the weight loss of  $\text{NiSe}_2/\text{CG}$  is 91.0 wt%. After heating to 500 °C in the air, the final product is  $\text{Ni}_2\text{O}_3$ . According to the reaction equation (1), the weight loss from pure  $\text{NiSe}_2$  to  $\text{Ni}_2\text{O}_3$  is 61.7 wt%. The weight reduction of composite is consisted of two parts: weight loss of the variation from  $\text{NiSe}_2$  to  $\text{Ni}_2\text{O}_3$  and the weight loss of carbon oxidation, which can be illustrated as the equation (2):

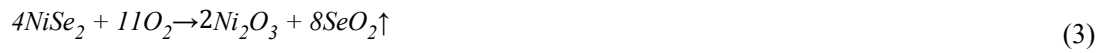

$$W \times 61.7\% + 100\% - W = 91.0\% \quad (4)$$

W represents the loading content of  $\text{NiSe}_2$ , and the loading content of carbon is (100%-W). Thus, the content of  $\text{NiSe}_2$  in  $\text{NiSe}_2/\text{CG}$  can be calculated as 23.5 wt%.

#### **Calculation of the relative content of $\text{CoSe}_2$ , $\text{NiSe}_2$ and carbon in $\text{NiCoSe}_x/\text{CG}$ .**

As shown in Figure 1c, the weight loss of  $\text{NiCoSe}_x/\text{CG}$  is 84.1 wt%. The weight reduction of composite is consisted of three parts: weight loss of the variation from  $\text{CoSe}_2$  to  $\text{Co}_3\text{O}_4$ ,  $\text{NiSe}_2$  to  $\text{Ni}_2\text{O}_3$  and the weight loss of carbon oxidation.

W represents the loading content of  $\text{CoSe}_2$ . Because the ratio of cobalt to nickel in the raw material is controlled to be 1:1, the loading content of  $\text{NiSe}_2$  is also W, and the loading content of carbon is  $(100\%-2W)$ . Thus, according to the equation (5), it can be calculated that the content of  $\text{CoSe}_2$  in  $\text{NiCoSe}_x/\text{CG}$  is 21.1 wt%, the content of  $\text{NiSe}_2$  in  $\text{NiCoSe}_x/\text{CG}$  is 21.1 wt%.

$$W \times 63.0\% + W \times 61.7\% + 100\% - W = 84.1\% \quad (5)$$

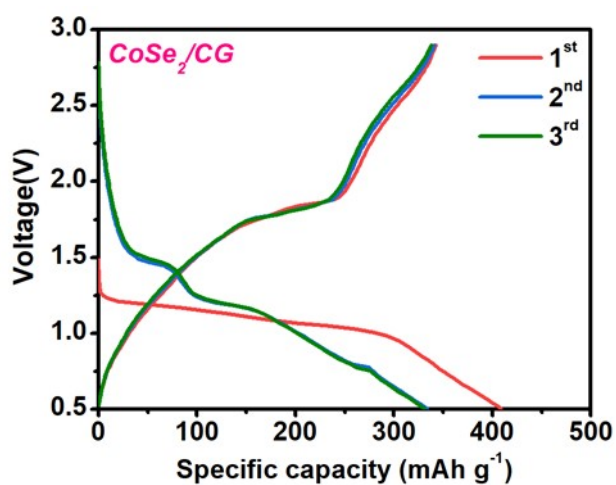

**Fig. S3** Initial three discharge/charge voltage curves at  $0.1 \text{ A g}^{-1}$  of  $\text{CoSe}_2/\text{CG}$ .

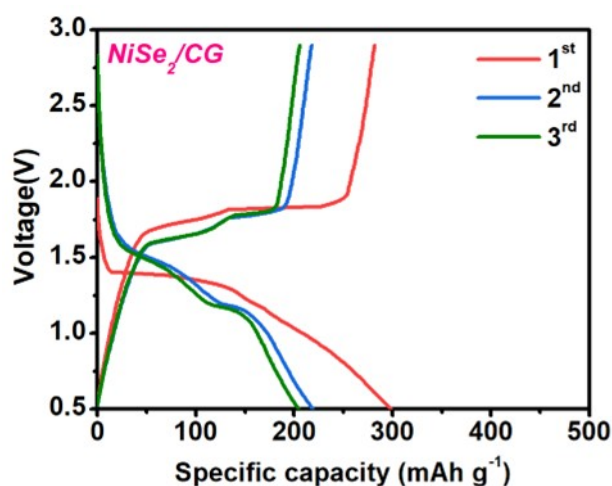

**Fig. S4** Initial three discharge/charge voltage curves of  $\text{NiSe}_2/\text{CG}$  at  $0.1 \text{ A g}^{-1}$ .

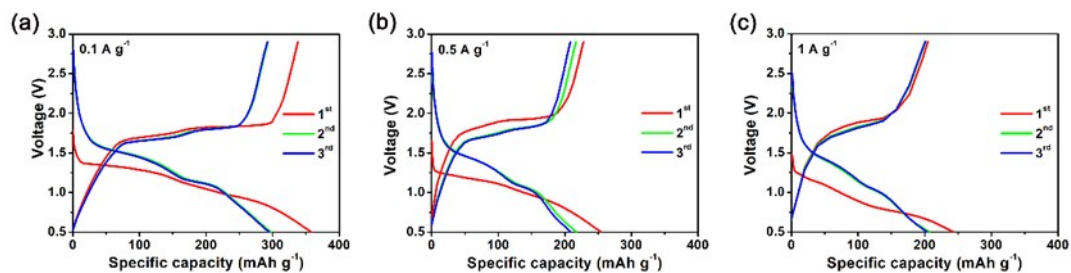

**Fig. S5** The initial three discharge/charge curves of NiCoSe<sub>x</sub>/CG at different current densities.

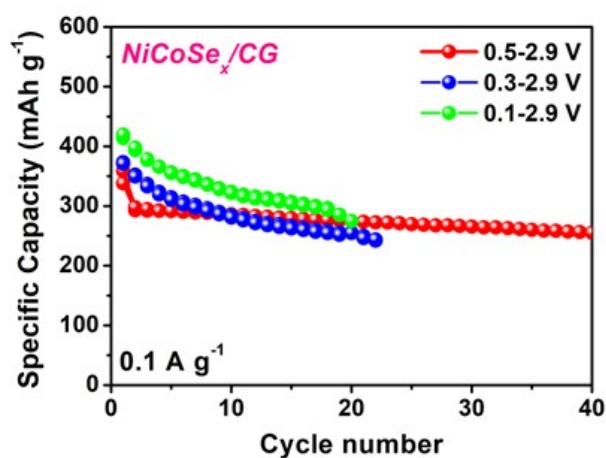

**Fig. S6** Cyclic performance of NiCoSe<sub>x</sub>/CG at different voltage ranges.

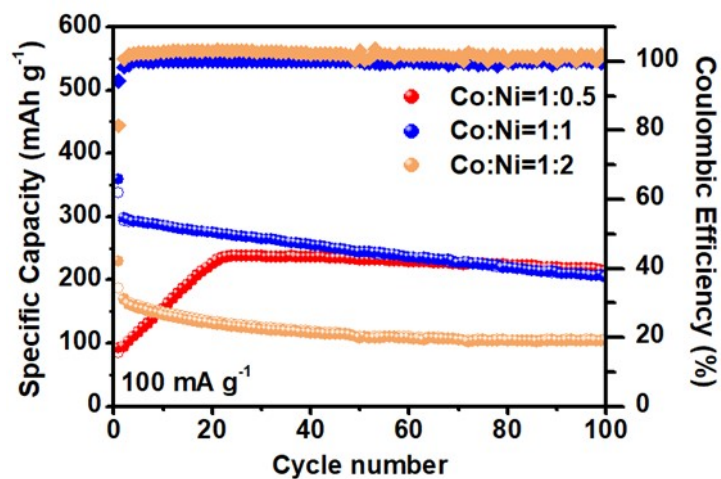

**Fig. S7** Cyclic performance of NiCoSe<sub>x</sub>/CG with different cobalt to nickel at 0.1 A g<sup>-1</sup>.

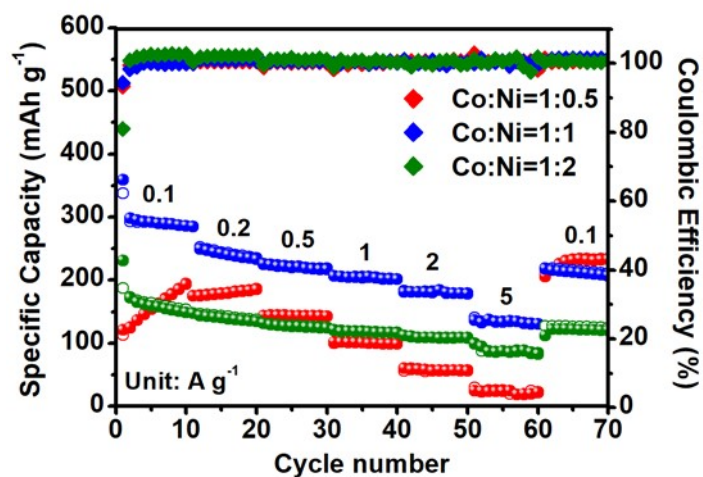

**Fig. S8** Rate performance of NiCoSe<sub>x</sub>/CG with different cobalt to nickel at various current density from 0.1 to 5 A g<sup>-1</sup>.

**Table S1.** Randles equivalent circuit and the dynamical parameters of the CoSe<sub>2</sub>/CG, NiSe<sub>2</sub>/CG and NiCoSe<sub>x</sub>/CG after three cycles at 100 mA/g.

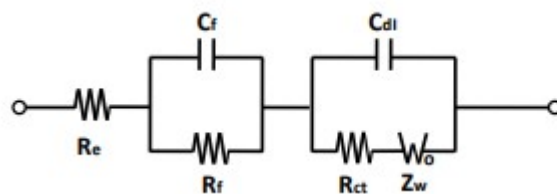

|                         | $R_e/\Omega$ | $R_f/\Omega$ | $R_{ct}/\Omega$ |
|-------------------------|--------------|--------------|-----------------|
| CoSe <sub>2</sub> /CG   | 13.4         | 58.5         | 43.5            |
| NiSe <sub>2</sub> /CG   | 11.8         | 27.0         | 29.2            |
| NiCoSe <sub>x</sub> /CG | 11.6         | 13.9         | 11.1            |

**Table S2.** A comparison of this work with previously reported performances of flexible anode materials for SIBs.

| Samples | Initial reversible | Capacity retention | Rate capability | Capacity retention | Ref |
|---------|--------------------|--------------------|-----------------|--------------------|-----|
|---------|--------------------|--------------------|-----------------|--------------------|-----|

|                                                                                 | capacity/mAh<br>·g <sup>-1</sup> | at a low<br>current<br>density                | mAh·g <sup>-1</sup> | mA·g <sup>-1</sup> | at a high<br>current<br>density            |              |
|---------------------------------------------------------------------------------|----------------------------------|-----------------------------------------------|---------------------|--------------------|--------------------------------------------|--------------|
| Bi <sub>4</sub> Se <sub>3</sub> /Bi <sub>2</sub> O <sub>2</sub> Se-<br>CNTs-rGO | 345.6                            | 68.1% at<br>0.1 A/g<br>after 100<br>cycles    | 345.6               | 0.1                | 84% at 1<br>A/g after<br>1000<br>cycles    | [1]          |
|                                                                                 |                                  |                                               | 235.3               | 0.2                |                                            |              |
|                                                                                 |                                  |                                               | 155                 | 0.5                |                                            |              |
|                                                                                 |                                  |                                               | 120.5               | 1                  |                                            |              |
|                                                                                 |                                  |                                               | 101.5               | 2                  |                                            |              |
| P-doped carbon<br>cloth                                                         | 186                              | 88% at<br>0.2 A/g<br>after 600<br>cycles      | 242.7               | 0.05               | null                                       | [2]          |
|                                                                                 |                                  |                                               | 215.5               | 0.1                |                                            |              |
|                                                                                 |                                  |                                               | 186.8               | 0.2                |                                            |              |
|                                                                                 |                                  |                                               | 152.7               | 0.5                |                                            |              |
|                                                                                 |                                  |                                               | 123.1               | 1                  |                                            |              |
| Crumpled graphene                                                               | 190                              | null                                          | 183                 | 0.1                | 89% at 1<br>A/g after<br>500<br>cycles     | [3]          |
|                                                                                 |                                  |                                               | 150                 | 0.2                |                                            |              |
|                                                                                 |                                  |                                               | 120                 | 0.5                |                                            |              |
|                                                                                 |                                  |                                               | 100                 | 1                  |                                            |              |
|                                                                                 |                                  |                                               | 80                  | 2                  |                                            |              |
| graphene stacks                                                                 | 145                              | 83% at<br>0.3 A/g<br>after<br>1000<br>cycles  | 163                 | 0.1                | null                                       | [4]          |
|                                                                                 |                                  |                                               | 143                 | 0.3                |                                            |              |
|                                                                                 |                                  |                                               | 120                 | 0.5                |                                            |              |
|                                                                                 |                                  |                                               | 100                 | 1                  |                                            |              |
|                                                                                 |                                  |                                               | 82                  | 2                  |                                            |              |
| Ni-CNTs                                                                         | 101                              | 91% at<br>0.05 A/g<br>after<br>1800<br>cycles | 110                 | 0.1                | null                                       | [5]          |
|                                                                                 |                                  |                                               | 82                  | 0.2                |                                            |              |
|                                                                                 |                                  |                                               | 78                  | 0.5                |                                            |              |
|                                                                                 |                                  |                                               | 72                  | 1                  |                                            |              |
|                                                                                 |                                  |                                               | 67                  | 2                  |                                            |              |
| Bismuth Selenide<br>/Graphene                                                   | 695                              | 33.4% at<br>0.05 A/g<br>after 50<br>cycles    | 400                 | 0.05               | null                                       | [6]          |
|                                                                                 |                                  |                                               | 210                 | 0.1                |                                            |              |
|                                                                                 |                                  |                                               | 160                 | 0.2                |                                            |              |
|                                                                                 |                                  |                                               | 70                  | 0.5                |                                            |              |
|                                                                                 |                                  |                                               | 30                  | 1                  |                                            |              |
| NiCoSe <sub>x</sub> /CG                                                         | 338                              | 61% at<br>0.1 A/g<br>after 100<br>cycles      | 338                 | 0.1                | 66% at<br>2 A/g<br>after<br>1000<br>cycles | This<br>work |
|                                                                                 |                                  |                                               | 285                 | 0.2                |                                            |              |
|                                                                                 |                                  |                                               | 225                 | 0.5                |                                            |              |
|                                                                                 |                                  |                                               | 206                 | 1                  |                                            |              |
|                                                                                 |                                  |                                               | 183                 | 2                  |                                            |              |
|                                                                                 |                                  |                                               | 140                 | 5                  |                                            |              |

## References

- [1] Liu H, Li D, Liu H, et al. Binary self-assembly of ordered Bi<sub>4</sub>Se<sub>3</sub>/Bi<sub>2</sub>O<sub>2</sub>Se lamellar architecture embedded into CNTs@Graphene as a binder-free electrode for superb Na-Ion storage. *J Colloid Interface Sci*, **2022**, *620*: 168-178.
- [2] Lu H Y, Zhang X H, Wan F, et al. Flexible P-Doped Carbon Cloth: Vacuum-Sealed Preparation and Enhanced Na-Storage Properties as Binder-Free Anode for Sodium Ion Batteries. *ACS Appl Mater. Interfaces*, **2017**, *9(14)*: 12518-12527.
- [3] Yun Y S, Park Y-U, Chang S-J, et al. Crumpled Graphene Paper for High Power Sodium Battery Nnode . *Carbon*, **2016**, *99*: 658-664.
- [4] Choe J H, Kim N R, Lee M E, et al. Flexible Graphene Stacks for Sodium-Ion Storage. *ChemElectroChem*, **2017**, *4(3)*: 716-720.
- [5] Zhu Y H, Yuan S, Bao D, et al. Decorating Waste Cloth via Industrial Wastewater for Tube-Type Flexible and Wearable Sodium-Ion Batteries. *Adv Mater.*, **2017**, *29(16)*: 1603719.
- [6] Chen X, Tang H, Huang Z, et al. Flexible Bismuth Selenide /Graphene Composite Paper for Lithium-Ion Batteries. *Ceram Int*, **2017**, *43(1)*: 1437-1442.
